# Supplementary material for: Histone lysine dimethyl-demethylase KDM3A controls pathological cardiac hypertrophy and fibrosis
Source: PubMed Central journal article supplement (PMC6286331; doi:10.1038/s41467-018-07173-2), 2018-12-07
Supplement: 41467_2018_7173_MOESM1_ESM.pdf [file 41467_2018_7173_MOESM1_ESM.pdf]

Supplementary figures.

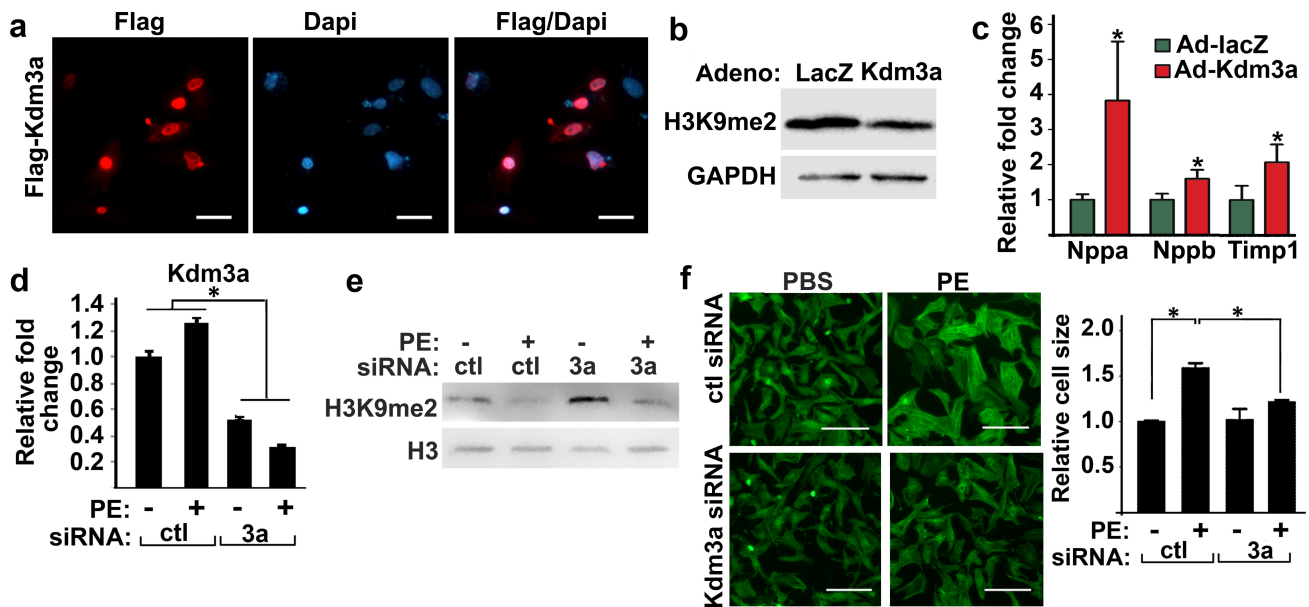

**Supplementary Figure 1. KDM3A promotes cardiomyocyte hypertrophy.** (a) Immunofluorescence staining of Flag-tagged KDM3A in NRVMs transduced with adenovirus expressing Flag-Kdm3a using anti-Flag antibody. Scale bar, 20  $\mu$ M. (b) WB of H3K9me2 of NRVMs transduced with adenoviruses expressing LacZ (Ad-LacZ) or Kdm3a (Ad-Kdm3a). Gapdh was used as loading control. Overexpression of KDM3A in NRVMs resulted in downregulation of H3K9me2. (c) Relative mRNA of genes indicated from NRVMs transduced with either Ad-LacZ or Ad-Kdm3a. Overexpression of Kdm3a upregulated canonical genes associated with cardiomyocyte hypertrophy and Timp1.  $n=3 \pm \text{SEM}$ , \*,  $p < 0.05$  (t test), relative to LacZ-transduced cells. (d-f) NRVMs were transfected with control or Kdm3a specific siRNA and stimulated with or without PE. Kdm3a knockdown (KD) resulted in approximately 50% downregulation of Kdm3a mRNA relative to control siRNA transfected cells (d). Kdm3a KD also resulted in upregulation of H3K9me2 (e). (f) Relative cell size of NRVMs in Kdm3a siRNA or control siRNA transfected cells and stimulated with or without PE. Kdm3a KD attenuated PE-stimulated myocyte hypertrophy \*,  $p < 0.05$  (ANOVA). Scale bar, 100  $\mu$ m.

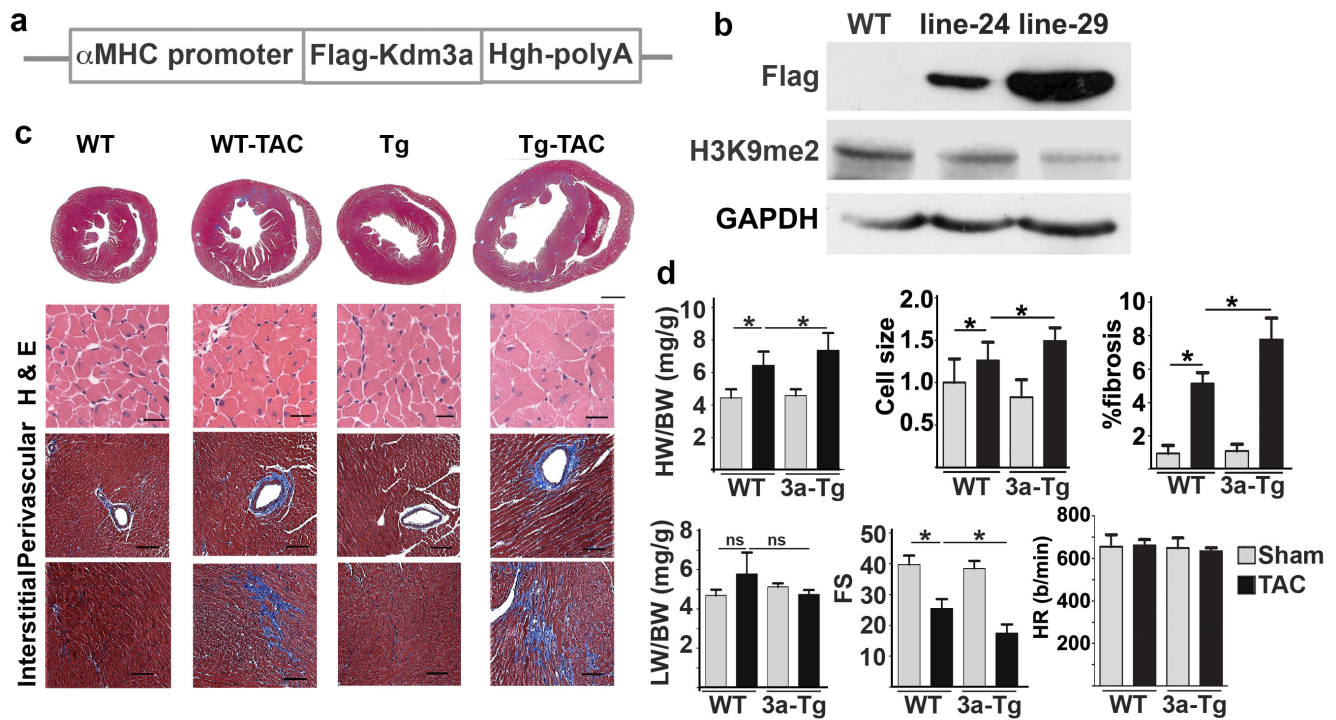

**Supplementary Figure 2. KDM3A promotes TAC-induced hypertrophic remodeling. (a)**

Schematics of *Kdm3a* transgenic construct. (b) Western blot of expression levels of Flag-Kdm3a and H3K9me2 in the heart. GAPDH was used as loading control. (c) H&E (top two panels) and trichrome (lower two panels) staining of histological sections of WT and *Kdm3a*-Tg (line 29) mouse hearts at week 6 post-sham and TAC surgery. Scale bars, 1mm (first panel), 20  $\mu$ m (second panel), 100  $\mu$ m (3<sup>rd</sup> and 4<sup>th</sup> panels). (d) HW/BW, LW/BW, FS, and Heart rate of *Kdm3a*-Tg (line 24) mouse hearts at week 6 post-sham and TAC surgery. n=5-9 $\pm$ SEM. \*,  $p < 0.05$  (ANOVA).

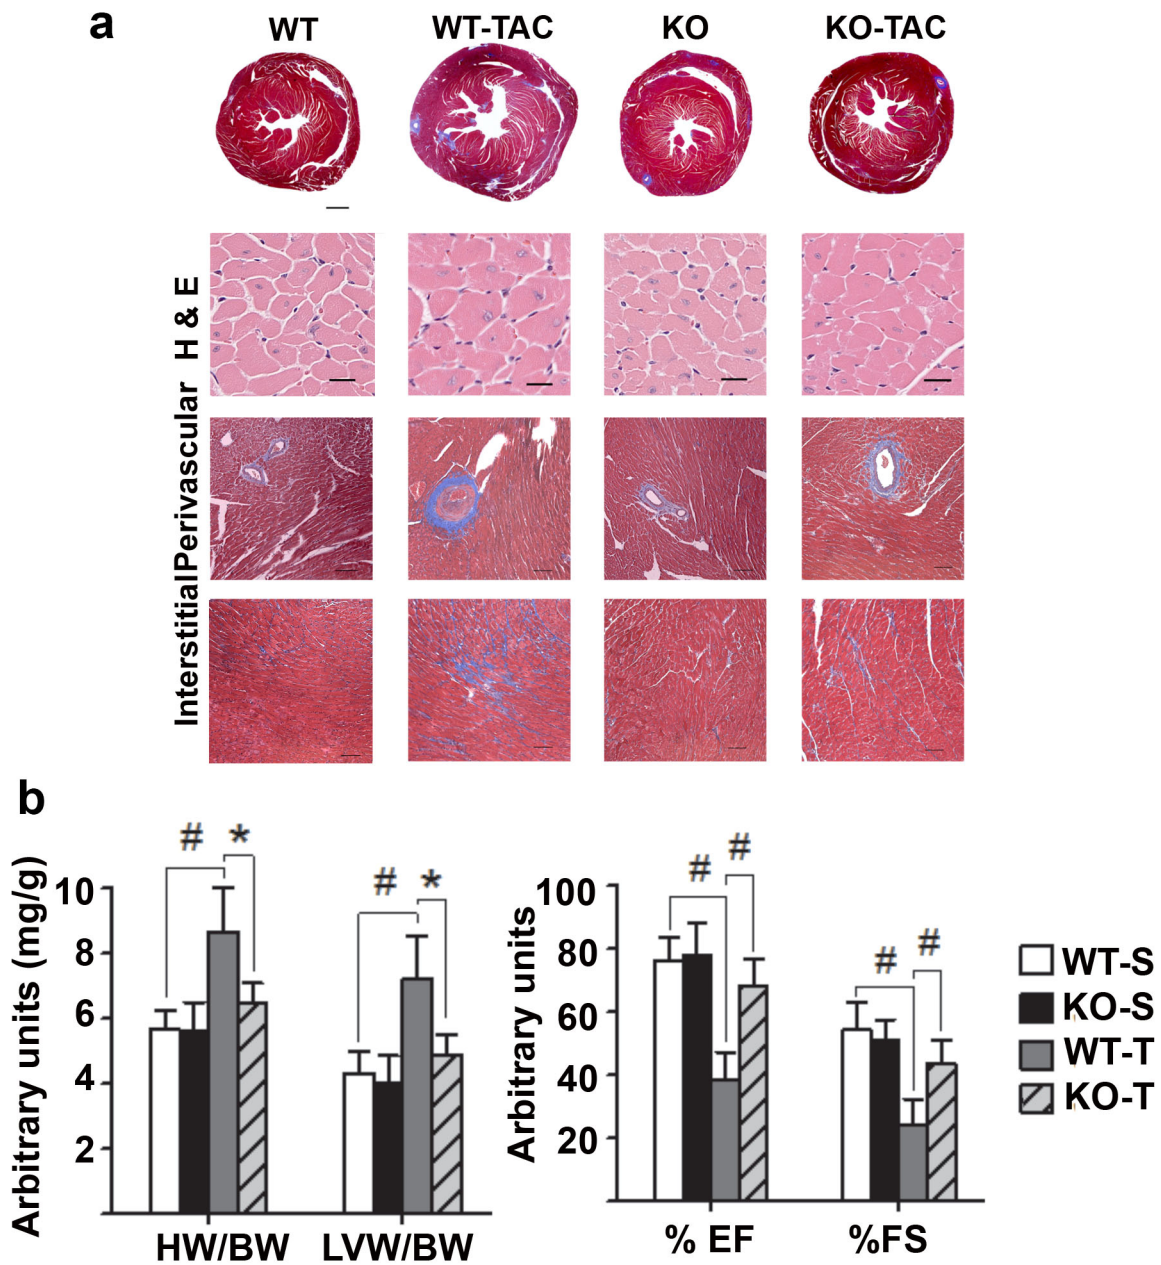

**Supplementary Figure 3. *Kdm3a*-deficiency protects mice against hypertrophic remodeling in response to TAC injury.** (a) H&E (top two panels) and trichrome (lower two panels) staining of histological sections of WT and *Kdm3a* KO mouse (in FVB/C57/BI6 mixed background) hearts at week 6 post-sham and TAC surgery. Scale bars, 1mm (first panel), 20  $\mu$ m (second panel), 100  $\mu$ m (3<sup>rd</sup> and 4<sup>th</sup> panels). (b) HW/BW, LW/BW, ejection fraction (EF) and FS of *Kdm3a* KO mouse (in C57/BI6 background) hearts at week 6 post-sham and TAC surgery.  $n=3-4 \pm$ SEM. \*,  $p<0.05$ . #,  $p<0.01$  (ANOVA).

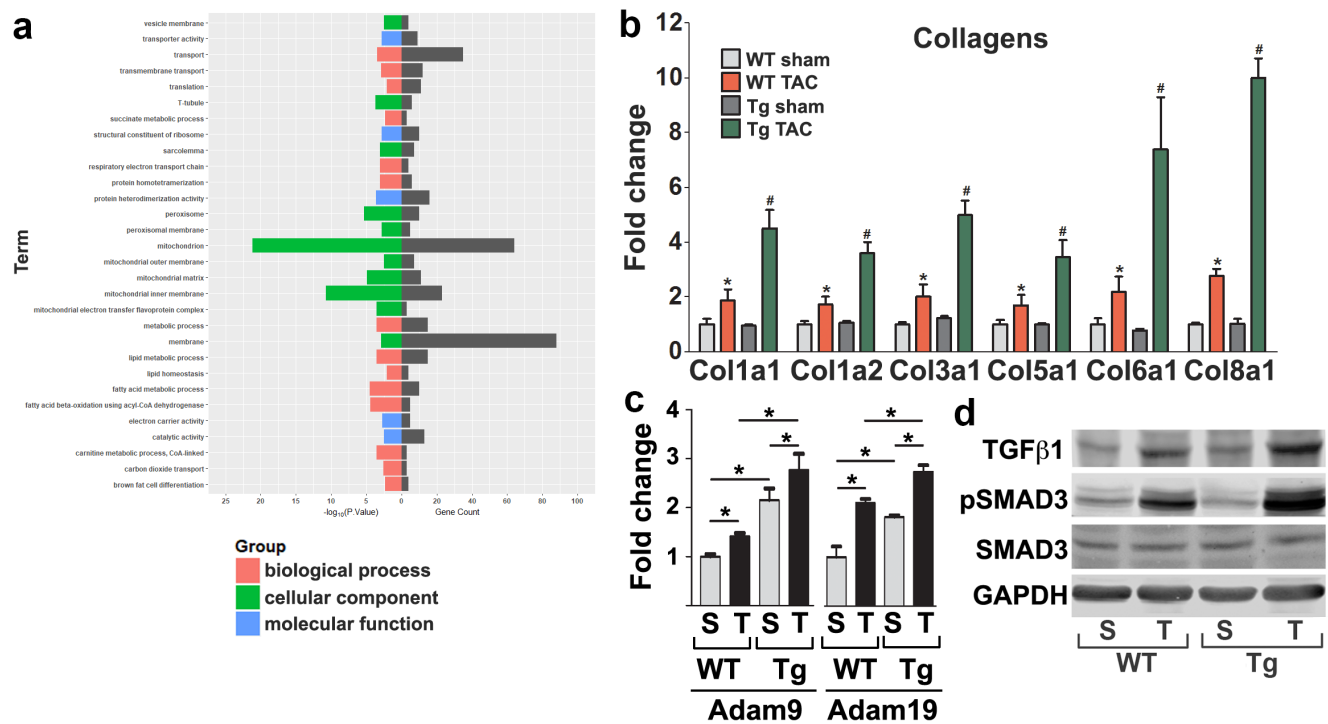

**Supplementary Figure 4.** (a) GO analysis of upregulated genes in *Kdm3a* KO TAC mouse hearts vs WT TAC littermates. (b) Relative fold change of mRNA of collagens in WT and *Kdm3a*-Tg mice at week 6 post-sham and TAC surgery.  $n=4\pm\text{SEM}$ . \*, relative to sham,  $p<0.05$ . #, relative to WT TAC,  $p<0.05$  (ANOVA). (c) Adam9 and Adam19 in WT and TG mouse heart at week 6 post-sham and TAC surgery.  $n=4\pm\text{SEM}$ , \*,  $p<0.05$  (ANOVA). (d) Western blot of indicated proteins in WT and *Kdm3a*-Tg mouse hearts at week 6 post-sham and TAC surgery.

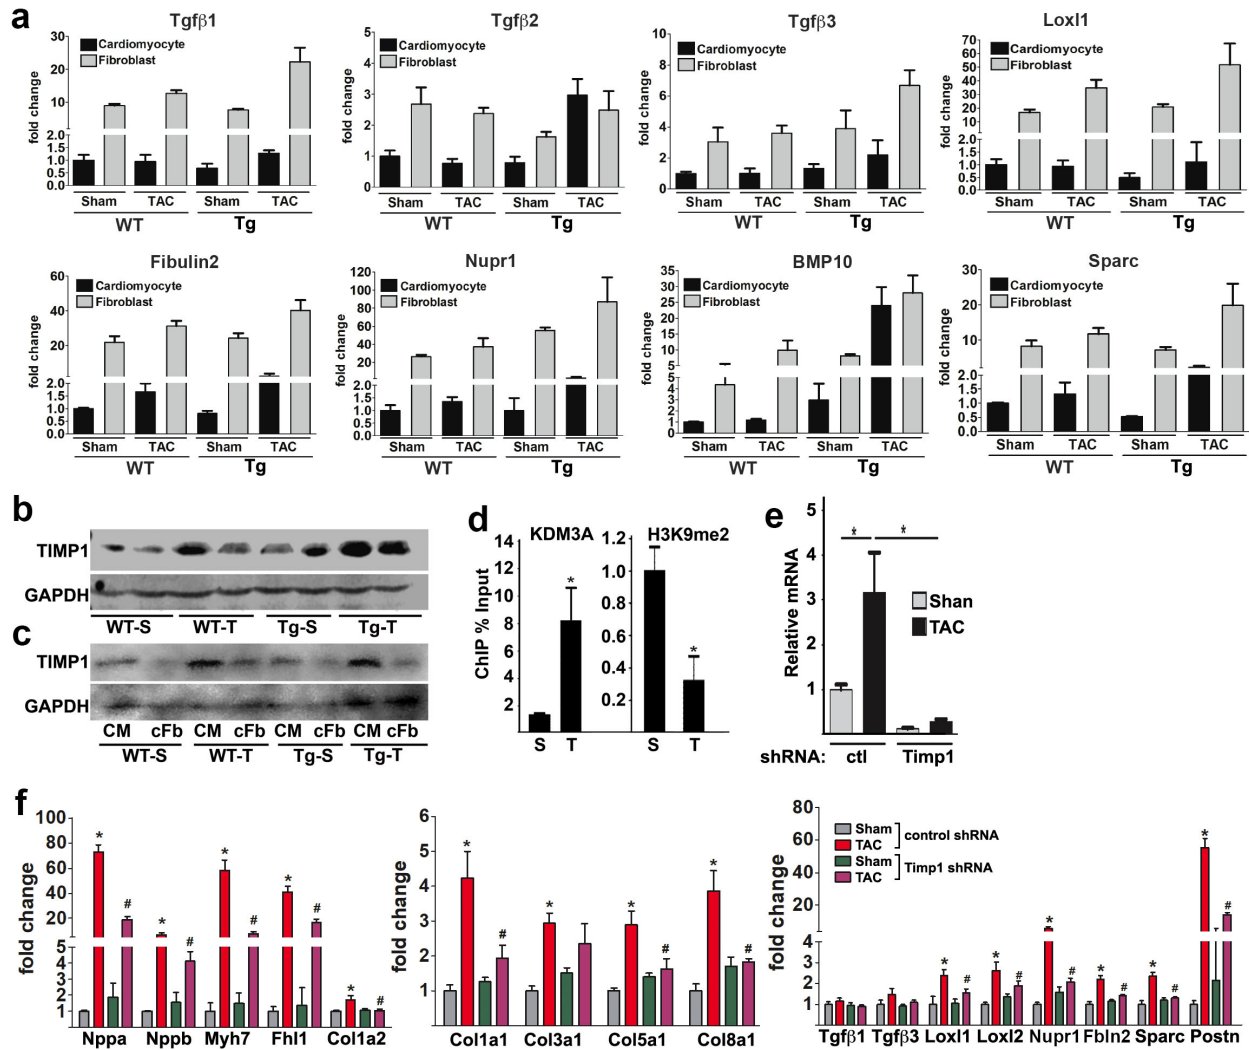

**Supplementary Figure 5.** (a) Relative fold change of transcripts of genes involved in fibrosis in cardiomyocytes (CM) and fibroblasts (cFb, non-cardiomyocytes) fractions of WT and *Kdm3a*-Tg mouse hearts at week 6 post-sham and TAC surgery  $n=3\pm SEM$ ,  $*, p<0.05$  (ANOVA). (b) Western blot of TIMP1, showing upregulation of TIMP1 in *Kdm3a*-Tg mouse hearts and in response to TAC surgery. (c) Western blot of TIMP1 in CM and cFb isolated from WT and *Kdm3a*-Tg mouse at week 6 post-Sham and TAC surgery. (d) *Kdm3a*-Tg mouse hearts at weeks 6 post-Sham and TAC surgery were used for ChIP assay with antibodies against KDM3A (left panel) or H3K9me2 (right panel). The relative occupancies of KDM3A and H3K9me2 at *Timp1* promoter were normalized against Input and expressed relative to Sham control.  $n=3\pm SEM$ ,  $*, p<0.05$  (t test). (e) Relative fold change of *Timp1* mRNA in Sham and TAC *Kdm3a*-Tg mouse hearts treated with control or *Timp1* shRNA  $n=3\pm SEM$ ,  $*, p<0.05$  (ANOVA). (f) Relative mRNA of hypertrophic and fibrotic genes in Sham and TAC *Kdm3a*-Tg mouse hearts treated with control or *Timp1* shRNA.  $n=4\pm SEM$ .  $*$  control shRNA TAC vs Sham,  $\#$  *Timp1* shRNA TAC vs control shRNA TAC.  $\#$ ,  $*, p<0.05$  (ANOVA).

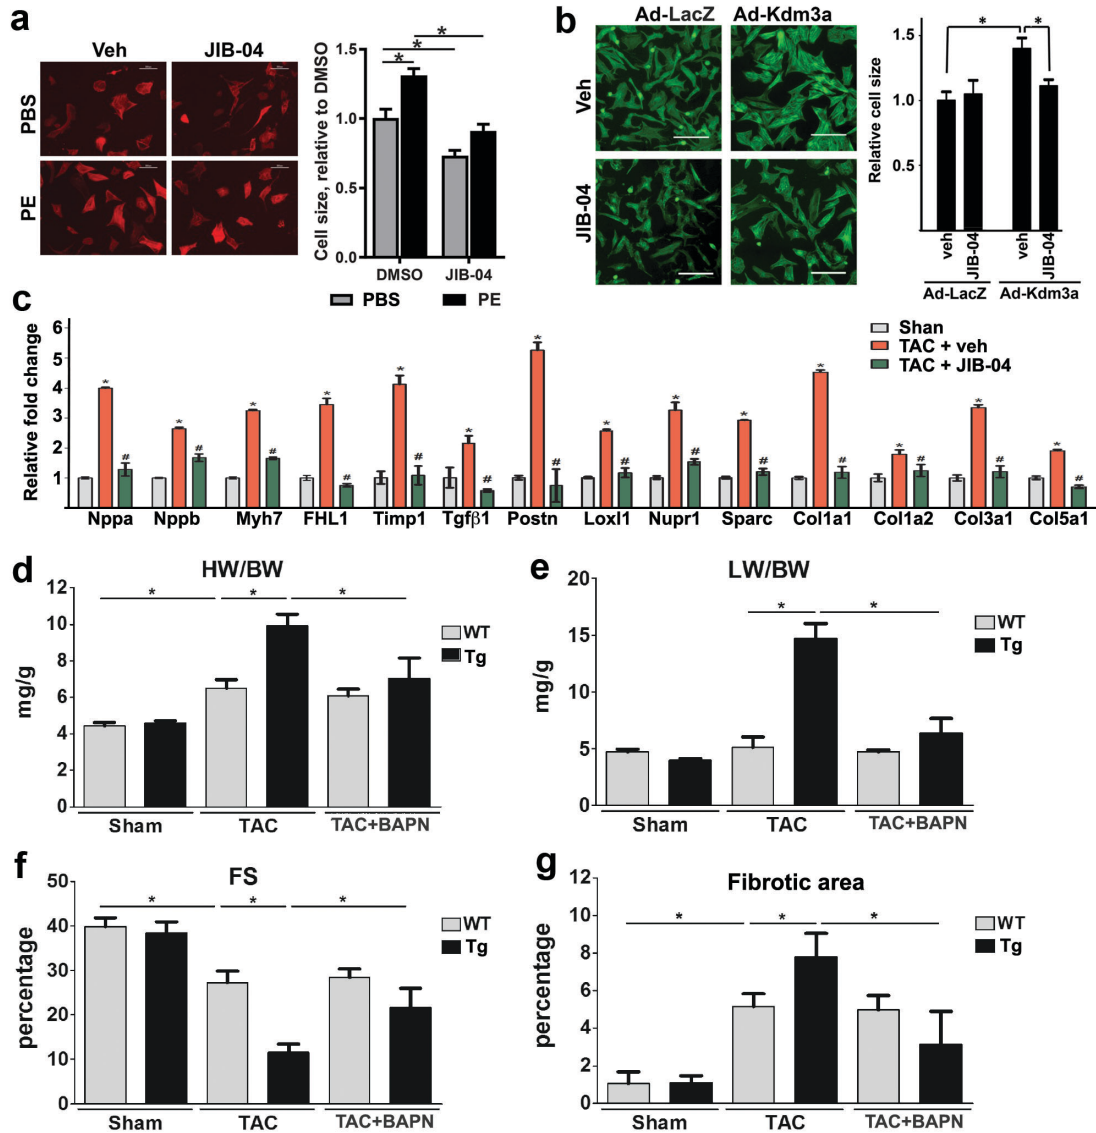

**Supplementary Figure 6.** (a) NRVMs were stimulated with PBS or PE, treated with JIB-04 or vehicle DMSO. JIB-04 suppressed PE-stimulated myocyte hypertrophy.  $n=3\pm\text{SEM}$ ,  $^*p<0.05$  (ANOVA). (b) NRVMs transduced with either Ad-LacZ or Ad-Kdm3a were treated with JIB-04 or vehicle DMSO. JIB-04 suppressed Kdm3a-promoted myocyte hypertrophy  $n=3\pm\text{SEM}$ ,  $^*p<0.05$  (ANOVA). Scale bar, 100  $\mu\text{m}$ . (c) Relative mRNA of fetal genes and genes involved in fibrosis in *Kdm3a*-Tg sham and TAC mouse hearts treated with vehicle or JIB-04 starting at post-TAC week 3 for 4 weeks. mRNA transcripts were measured by qRT-PCR, normalized against internal Gapdh, and expressed relative to Sham mice.  $n=3\pm\text{SEM}$ .  $^*p<0.05$ ,  $^* \text{TAC vs Sham}$ ,  $^\# \text{JIB-04 vs vehicle}$   $n=3\pm\text{SEM}$ ,  $^*p<0.05$  (ANOVA). (d-g) *Kdm3a*-Tg and WT littermates were subjected to TAC surgery and treated with Lox inhibitor  $\beta$ -aminopropionitrile (BAPN) (8 mg/ml in drinking water). Echocardiograph was performed at week 6 post-TAC and hearts were harvested. HW/BW (c), LW/BW (d), FS (e), and relative fibrotic area (f) were measured.  $n=5-9\pm\text{SEM}$ ,  $^*p<0.05$  (ANOVA).

**Supplementary Figure 7** Full, un-cropped Western blots in main article figures and supplementary figures. Boxes indicate regions cropped in the main article.

Fig. 5h

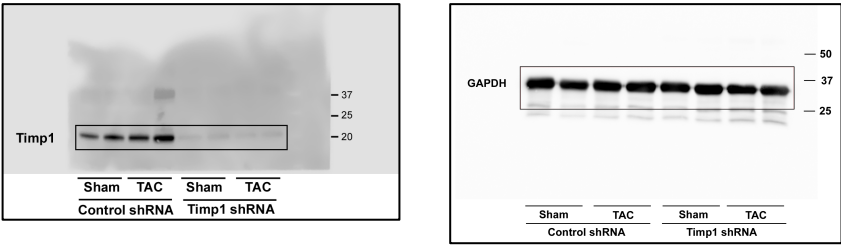

Fig. 6g

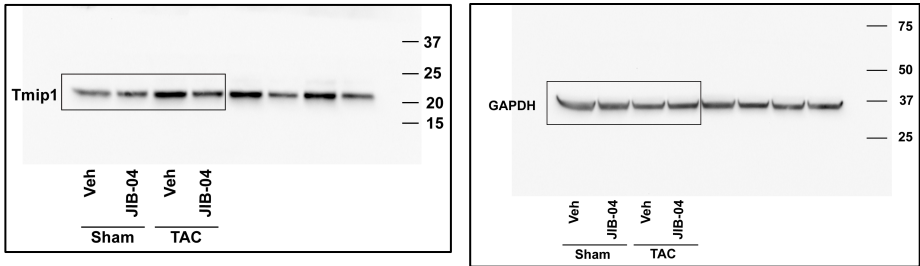

Fig. 8a

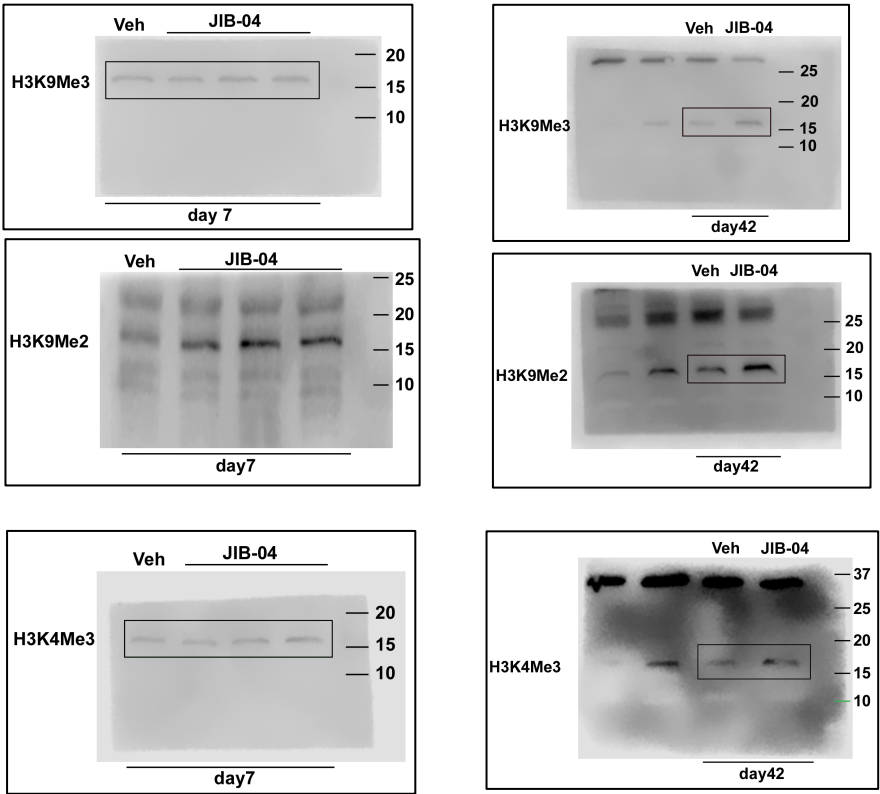

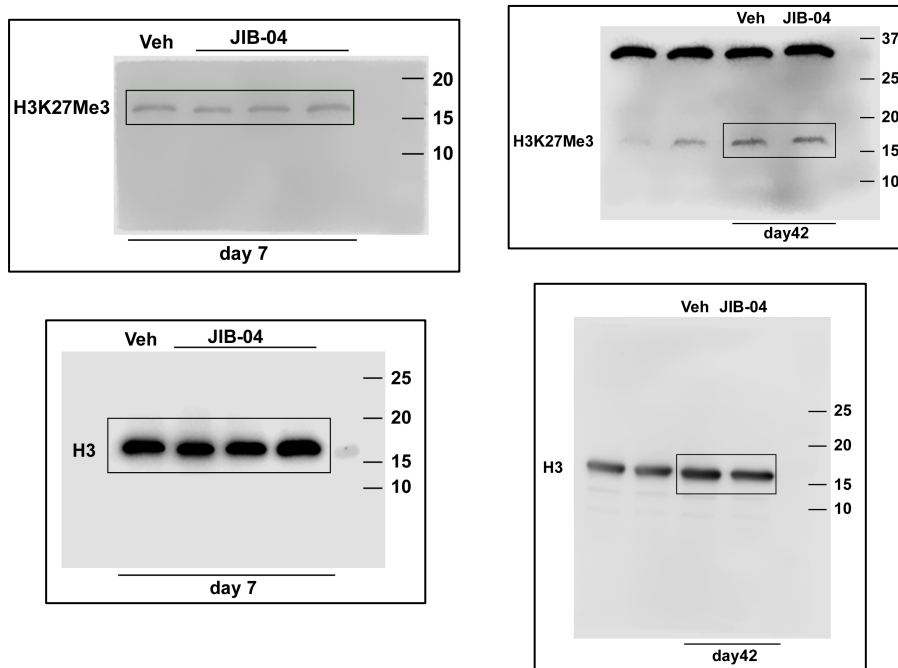

Fig. 8b

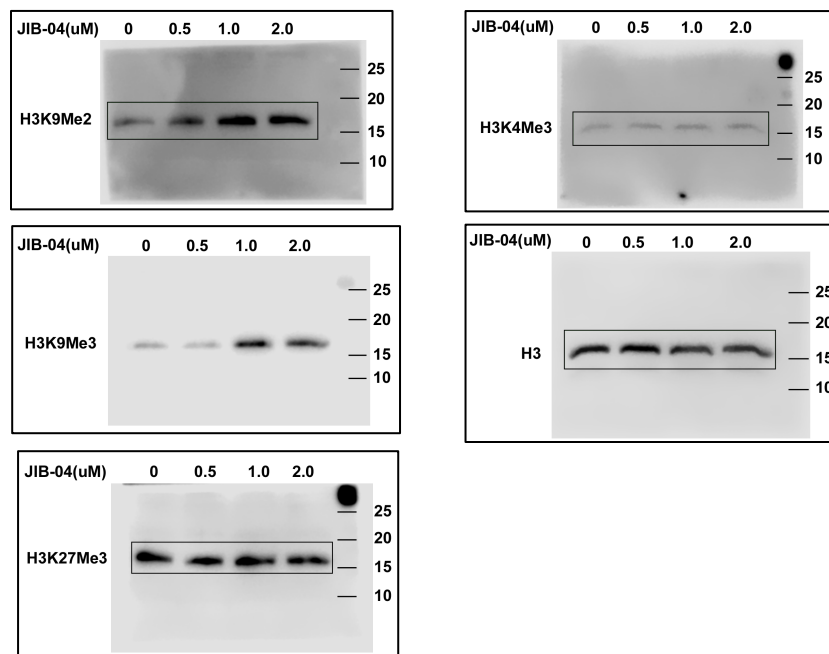



Fig. 8c

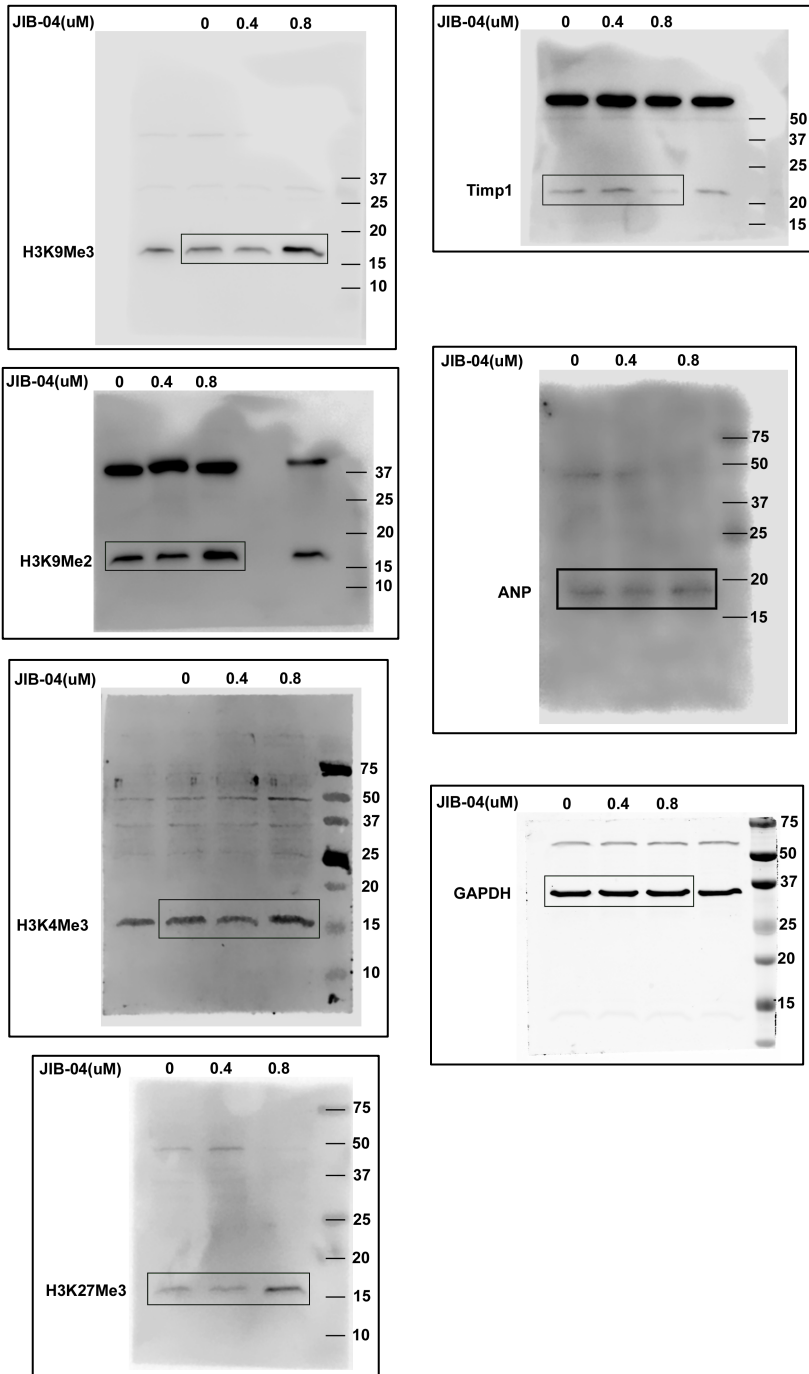

Supplementary Figure 1b

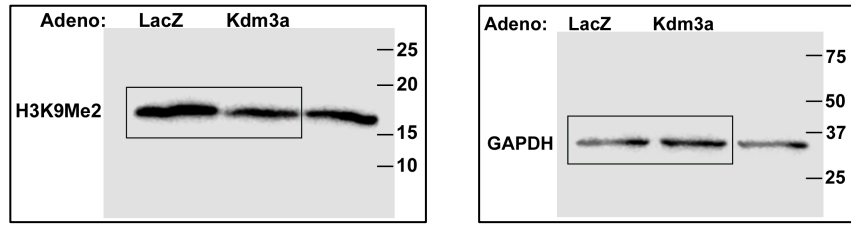

Supplementary Figure 1e

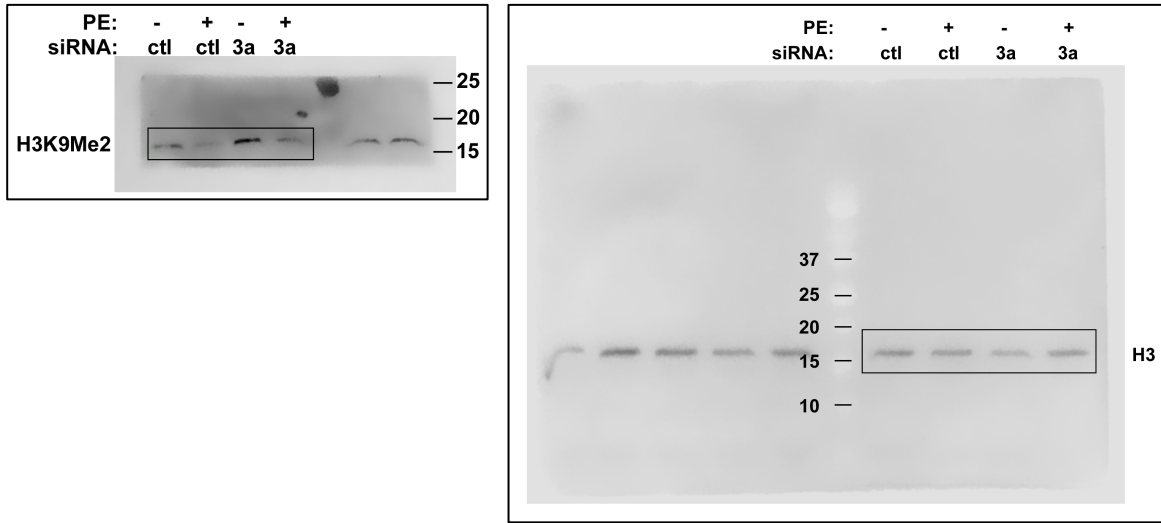

Supplementary Figure 2b

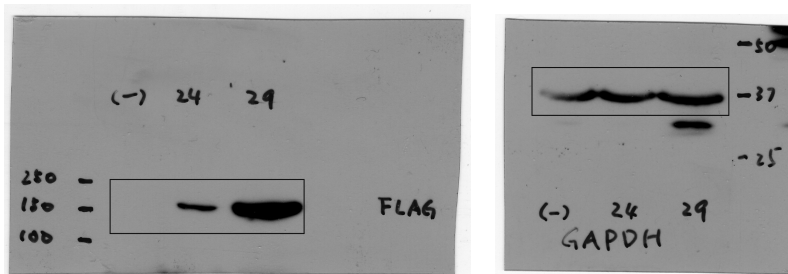

Supplementary Figure 4d

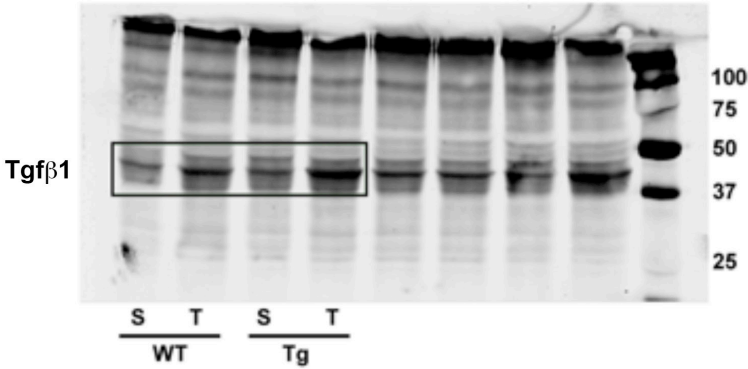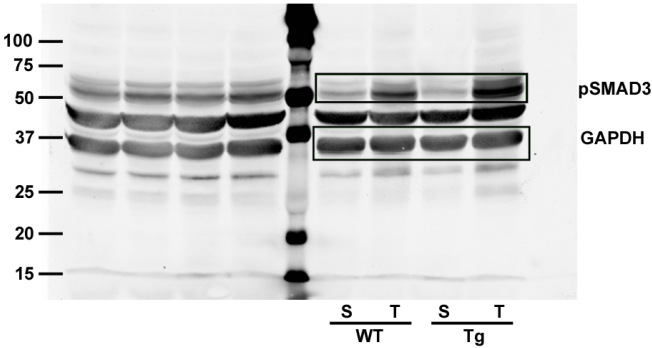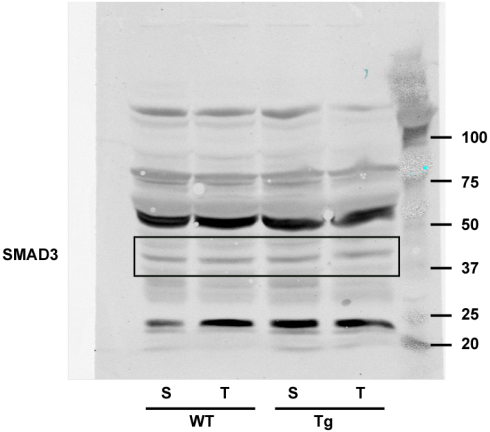



Supplementary table 1: primer sequences

| Primer name         | Sequence(5' to 3')                                        |
|---------------------|-----------------------------------------------------------|
| human GAPDH qPCR    | p1: AGCCACATCGCTCAGACAC<br>p2: GCCCAATACGACCAAATCC        |
| human KDM3A qPCR    | p1: CCAGCCTCAAAGGAAGACCT<br>p2: ACTGCACCAAGAGTCGGTTT      |
| mouse Gapdh qPCR    | p1: GGCACAGTCAAGGCTGAGAATG<br>p2: ATGGTGGTGAAGACGCCAGTA   |
| mouse Nppa qPCR     | p1: CAACACAGATCTGATGGATTTCA<br>p2: CCTCATCTTCTACCGGCATC   |
| mouse Nppb qPCR     | p1: GTCAGTCGTTTGGGCTGTAAC<br>p2: AGACCCAGGCAGAGTCAGAA     |
| mouse Myh7 qPCR     | p1: CGCATCAAGGAGCTCACC<br>p2: CTGCAGCCGCAGTAGGTT          |
| mouse Fhl1 qPCR     | p1: GGCTTCTCAAAGACACTCAGG<br>p2: TCGAACTTCTCCGACATGGT     |
| mouse Tgfβ1 qPCR    | p1: CTCCCGTGGCTTCTAGTGC<br>p2: GCCTTAGTTTGGACAGGATCTG     |
| mouse Tgfβ2 qPCR    | p1: TCGACATGGATCAGTTTATGCG<br>p2: CCCTGGTACTGTTGTAGATGGA  |
| mouse Tgfβ3 qPCR    | p1: CCTGGCCCTGCTGAACTTG<br>p2: TTGATGTGGCCGAAGTCCAAC      |
| mouse Timp1 qPCR    | p1: AGCCTGGAGGCAGTGATTTT<br>p2: GGGCCATCATGGTATCTCTGG     |
| mouse LoxL1qPCR     | p1: GAGTGCTATTGCGCTTCCC<br>p2: GGTGCGGAAGTCACAGGT         |
| mouse LoxL2 qPCR    | p1: ATTAACCCCAACTATGAAGTGCC<br>p2: CTGTCTCCTCACTGAAGGCTC  |
| mouse Nupr1 qPCR    | p1: CCCTTCCCAGCAACCTCTAAA<br>p2: TCTTGGTCCGACCTTTCCGA     |
| mouse Fibulin2 qPCR | p1: CTGTGAAGACCAAGACGAGTG<br>p2: CGTTGAGGATATAGCCCTCTGC   |
| mouse Sparc qPCR    | p1: GTGGAATGGGAGAATTTGAGGA<br>p2: CTCACACACCTTGCCATGTTT   |
| mouse Postn qPCR    | p1: CGGGAAGAACGAATCATTACA<br>p2: ACCTTGGAGACCTCTTTTTGC    |
| mouse Bmp10 qPCR    | p1: ATGGGGTCTCTGGTTCTG<br>p2: CAATACCATCTTGCTCCGTGAA      |
| mouse Col1a1 qPCR   | p1: GCTCCTCTTAGGGGCCACT<br>p2: CCACGTCTCACCATTGGGG        |
| mouse Col1a2 qPCR   | p1: AGCCCTGGTTCTCGAGGT<br>p2: CCGGTTGAACCACGATTG          |
| mouse Col3a1 qPCR   | p1: CTGTAACATGGAACTGGGGAAA<br>p2: CCATAGCTGAACTGAAAACCACC |
| mouse Col5a1 qPCR   | p1: CTTCGCCGCTACTCCTGTTC<br>p2: CCCTGAGGGCAAATTGTGAAAA    |
| mouse Col6a1 qPCR   | p1: AGGCCCTATTGGGCTTCAAG<br>p2: GCCAGTGTATCCTCGCTCTC      |
| mouse Col8a1 qPCR   | p1: ACTCTGTCAGACTCATTGAGGC<br>p2: CAAAGGCATGTGAGGGACTTG   |
| mouse Adam9 qPCR    | p1: GGAAGGCTCCCTACTCTCTGA<br>p2: TCCAAAACCTGGCATTCTCCAAA  |

---

|                           |                                                                             |
|---------------------------|-----------------------------------------------------------------------------|
| mouse Adam19 qPCR         | p1: TCAGTGGCGGACTTCAGAAAG<br>p2: GCAAAAAGGTGCTCGTTCTTC                      |
| rat Gapdh qPCR            | p1: ATCACCATCTTCCAGGAGCGA<br>p2: AGCCTTCTCCATGGTGGTGAA                      |
| rat Nppa qPCR             | p1: CACAGATCTGATGGATTTCAAGA<br>p2: CCTCATCTTCTACCGGCATC                     |
| rat Nppb qPCR             | p1: GTCAGTCGCTTGGGCTGT<br>p2: CAGAGCTGGGGAAAGAAGAG                          |
| rat Fhl1 qPCR             | p1: GGCTTCTCAAAGACACTCAGG<br>p2: GTCGAACTTCTCAGACATGGTG                     |
| rat Myh6 qPCR             | p1: TGCAGAAGAACTGAAGGAAAA<br>p2: GCTCCGCCTCTAGCTCCT                         |
| rat Timp1 qPCR            | p1: CAGCAAAGGCCTTCGTAAA<br>p2: TGGCTGAACAGGGAAACACT                         |
| rat Kdm3a qPCR            | p1: TTGCTCTGAGGTCTCTCCCAG<br>p2: TGCTGTCTGTTGCTAGATGGG                      |
| Kdm3a-Tg mouse genotyping | p1: AGTGGTGGTGTAGGAAAGT<br>p2: AACCACTGAGTAGATGGGTC                         |
| mouse Timp1 promoter      | p1: AAAAAGCTAGCGCTGGCAGGAGGTTTTTGTG<br>p2: AAAAAGCTCGAGAATCACTGCCTCCAGGCTTC |
| mouse Timp1 ChIP          | p1: AGGAAGGACTGTGCATGACG<br>p2: GGCCCCAGGATAAACCCAAA                        |

---
